# Supplementary material for: Harvest Age Effect on Phytochemical Content of White and Black Glutinous Rice Cultivars
Source: PubMed Central journal article supplement (PMC6943599; doi:10.3390/molecules24244432), 2019-12-04
Supplement: molecules-24-04432-s001.pdf [file molecules-24-04432-s001.pdf]

## Supplementary Materials

*Article*

# Harvest Age Effect on Phytochemical Content of White and Black Glutinous Rice Cultivars

**Kawintra Tamprasit**<sup>1</sup>, **Natthida Weerapreeyakul**<sup>2,3,\*</sup>, **Khaetthareeya Sutthanut**<sup>2,3</sup>, **Wipawee Thukhammee**<sup>3,4</sup>, **Jintanaporn Wattanathorn**<sup>3,4</sup>

<sup>1</sup> Graduate School (in the program of Aesthetic Sciences and Health), Faculty of Pharmaceutical Sciences, Khon Kaen University, Khon Kaen, 40002, Thailand; kawintra\_pop@hotmail.com (K.T.)

<sup>2</sup> Division of Pharmaceutical Chemistry, Faculty of Pharmaceutical Sciences, Khon Kaen University, Khon Kaen, 40002, Thailand; natthida@kku.ac.th (N.W.); khaesu@kku.ac.th (K.S.)

<sup>3</sup> Human High Performance and Health Promotion (HHP&HP) Research Institute, Khon Kaen University, Khon Kaen, 40002, Thailand; natthida@kku.ac.th (N.W.); khaesu@kku.ac.th (K.S.); meewep@gmail.com

<sup>4</sup> Department of Physiology, Faculty of Medicine, Khon Kaen University, Khon Kaen, 40002, Thailand; meewep@gmail.com (W.T.); jinwat05@gmail.com (J.W.)

\* Correspondence: natthida@kku.ac.th (N.W.); Tel.: +66-4320-2378

Received: date; Accepted: date; Published: date

**Supplementary Material, Figure S1**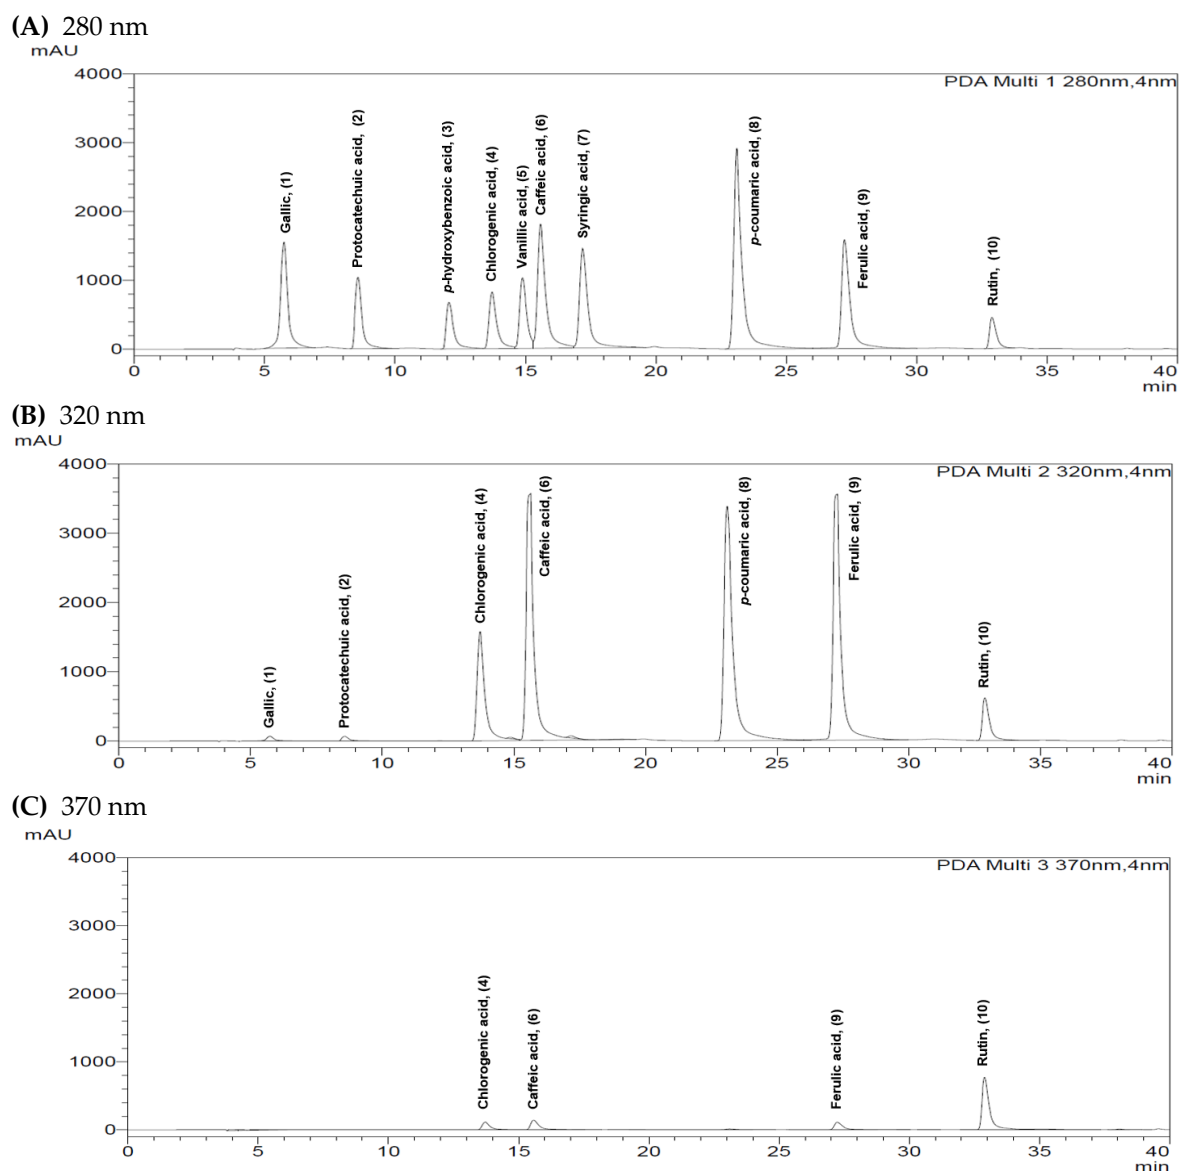

**Figure S1.** HPLC chromatograms of the mixture of 10 standard phenolics and flavonoids at 500  $\mu\text{g}/\text{ml}$  in methanol detected at 280, 320 and 370 nm. Peaks for phenolics are (i) hydroxybenzoic acids (viz., gallic acid (1), protocatechuic acid (2), *p*-hydroxybenzoic acid (3), vanillic acid (5), syringic acid (7); and, (ii) hydroxycinnamic acids (viz., chlorogenic acid (4), caffeic acid (6), *p*-coumaric acid (8), and ferulic acid (9). The flavonoid peak is rutin (10).

**Supplementary Material, Table S1**

**Table S1** Summary of R<sup>2</sup> obtained from the linear regression analysis among the phytochemical content and between the phytochemical content and harvest age of the RD6 and BGR cultivars.

|            |            | <b>BGR</b>   |              |              |              |
|------------|------------|--------------|--------------|--------------|--------------|
|            |            | <b>TPC</b>   | <b>TCC</b>   | <b>TAC</b>   | <b>TFC</b>   |
|            |            | 0.185        | 0.745        | 0.774        | 0.626        |
| <b>RD6</b> | <b>TPC</b> | <b>0.855</b> | 0.011        | 0.012        | 0.044        |
|            | <b>TCC</b> | 0.540        | <b>0.268</b> | <b>1.000</b> | <b>0.962</b> |
|            | <b>TAC</b> | 0.112        | 0.214        | <b>0.002</b> | <b>0.948</b> |
|            | <b>TFC</b> | 0.780        | <b>0.931</b> | 0.100        | <b>0.183</b> |

The lower left values represent the correlation coefficient of the RD6 cultivar, while the upper right values represent those of the BGR cultivar.

**Supplementary Material, Table S2****Table S2** Summary of the correlation coefficient (r) of phytochemical content and harvest age of each cultivar.

|            |            | <b>BGR</b>                    |                              |                               |                               |                               |
|------------|------------|-------------------------------|------------------------------|-------------------------------|-------------------------------|-------------------------------|
|            |            | <b>TPC</b>                    | <b>TCC</b>                   | <b>TAC</b>                    | <b>TFC</b>                    |                               |
|            |            | -0.396<br>( <i>p</i> =0.292)  | 0.863*<br>( <i>p</i> =0.003) | -0.880*<br>( <i>p</i> =0.001) | 0.791*<br>( <i>p</i> =0.002)  |                               |
| <b>RD6</b> | <b>TPC</b> | -0.944*<br>( <i>p</i> <0.001) | 1.000                        | 0.107<br>( <i>p</i> =0.7884)  | -0.111<br>( <i>p</i> =0.760)  | 0.210<br>( <i>p</i> =513)     |
|            | <b>TCC</b> | -0.735*<br>( <i>p</i> =0.024) | 0.518<br>( <i>p</i> =0.154)  | 1.000                         | -1.000*<br>( <i>p</i> <0.001) | 0.981*<br>( <i>p</i> <0.001)  |
|            | <b>TAC</b> | 0.335<br>( <i>p</i> =0.314)   | -0.463<br>( <i>p</i> =0.152) | 0.045<br>( <i>p</i> =0.908)   | 1.000                         | -0.974*<br>( <i>p</i> <0.001) |
|            | <b>TFC</b> | -0.883*<br>( <i>p</i> <0.001) | 0.965*<br>( <i>p</i> <0.001) | 0.316<br>( <i>p</i> =0.408)   | -0.428<br>( <i>p</i> =0.189)  | 1.000                         |

The lower left values represent the correlation coefficient of the RD6 cultivar, while the upper right values represent those of the BGR cultivar. TPC = Total phenolic content, TCC = Total chlorophyll content, TAC = Total anthocyanin content, TFC = Total flavonoid content, (r) near to +1 or -1 indicates a strong relationship and near to 0 indicates a weak or no relationship. \*Correlation is significant at  $p < 0.05$ .
